# Supplementary material for: The Virus-Induced Upregulation of the miR-183/96/182 Cluster and the FoxO Family Protein Members Are Not Required for Efficient Replication of HSV-1
Source: MDPI journal article supplement (doi:10.3390/v14081661), 2022-07-28
Supplement: s1 [file s1]

C

5' ...CUGUAGAUAGGACUGUGCCAUU...

3' UCACU

Position 263-270 of FOXO3 3' UTR

5' ...AUUUUACUACCAAGGUCGAA...  
3' GUACUUAAGAAGG-UCACGGUA

hsa-miR-183-5p

90.....208.....218.....228.....238.....248.....250

Human CCAUUGGCGAUUUCAGUUAUUGUCGUCUGAGUAGAAGAGUUGU-GCAGUAGGAAUUU

Chimp UUUCCCAUUGGCGAUUUCAGUUAUUGUCGUCUGAGUAGAAGAGUUGU-GCAGUAGGAAUUU

Rhesus UUUUCCCAUUGGCGAUUUCAGUUAUUGUCGUCUGAGUAGAAGAGUUGU-GCAGUAGGAAUUU

Squirrel UUUUCCCAUUGGCGAUUUCAGUUAUUGUCGUCUGAGUAGAAGAGUUGU-GCAGUAGGAAUUU

Human CCAUUGGCGAUUUCAGUUAUUGUCGUCUGAGUAGAAGAGUUGU-GCAGUAGGAAUUU

Rat UUUUCCCAUUGGCGAUUUCAGUUAUUGUCGUCUGAGUAGAAGAGUUGU-GCAGUAGGAAUUU

Rabbit CCAUUGGCGAUUUCAGUUAUUGUCGUCUGAGUAGAAGAGUUGU-GCAGUAGGAAUUU

Pig UUUUCCCAUUGGCGAUUUCAGUUAUUGUCGUCUGAGUAGAAGAGUUGU-GCAGUAGGAAUUU

Low UUUUCCCAUUGGCGAUUUCAGUUAUUGUCGUCUGAGUAGAAGAGUUGU-GCAGUAGGAAUUU

Cat CCAUUGGCGAUUUCAGUUAUUGUCGUCUGAGUAGAAGAGUUGU-GCAGUAGGAAUUU

Dog UUUUCCCAUUGGCGAUUUCAGUUAUUGUCGUCUGAGUAGAAGAGUUGU-GCAGUAGGAAUUU

Brown UUUUCCCAUUGGCGAUUUCAGUUAUUGUCGUCUGAGUAGAAGAGUUGU-GCAGUAGGAAUUU

Elephant CCAUUGGCGAUUUCAGUUAUUGUCGUCUGAGUAGAAGAGUUGU-GCAGUAGGAAUUU

miR-96-5p binding site

miR-183-5p.1 binding site

\_\_\_\_\_

[illegible]

miR-182-5p binding site

miR-96-5p binding site

miR-183-5p.2 binding site

5' ...AGGGUUUUUCUCACUGUGCCAAU...

3' GUCAC

Chimp CAGGA-AGBAAG--C-----ACUGCAGUGUCUACACU-AGUCCAAAGA--GUCA-  
Human CAGGA-AGBAAG--C-----ACUGCAGUGUCUACACU-AGUCCAAAGA--GUCA-  
Squirrel CAGGA-AGBAAG--C-----ACUGCAGUGUCUACACU-AGUCCAAAGA--GUCA-  
Rabbit CAGGA-AGBAAG--C-----ACUGCAGUGUCUACACU-AGUCCAAAGA--GUCA-  
Rat CAGGA-AGC-CAL--C-----ACUGCAGUGUCUACACU-AGUCCAAAGA--GUCA-  
Mouse CAGGA-AGBAAG--C-----ACUGCAGUGUCUACACU-AGUCCAAAGA--GUCA-  
Pig CAGGAAAAAA--C-----ACUGCAGUGUCUACACU-AGUCCAAAGA--GUCA-  
Cow CGA-G-AGAAAG--C-----UGUCUGACUGUCUACACU-AGUCCAAAGA--GUCA-  
Cat CAGGA-AGBAAG--C-----ACUGCAGUGUCUACACU-AGUCCAAAGA--GUCA-  
Dog CAGGA-AGBAAG--C-----ACUGCAGUGUCUACACU-AGUCCAAAGA--GUCA-  
Brown bat CAGGA-AGBAAG--C-----ACUGCAGUGUCUACACU-AGUCCAAAGA--GUCA-  
Elephant CAGGA-AGBAAG--C-----ACUGCAGUGUCUACACU-AGUCCAAAGA--GUCA-  
Opossum CAGGA-AGBAAG--A-----ACUGCAGUGUCUACACU-AGUCCAAAGA--GUCA-  
Chicken -----UAGCUGACUGUCUCCUUCU-AGUCCAG-------ACAG-  
Lizard -----UAGCUGACUGUCUCCUUCU-AGUCCAG-------ACAG-

miR-182-5p binding site

miR-96 5p binding site

5p 2 binding site

Sp.2 bilin

5' AGGGUUUUUUCUACAGUGGCCAAT

5 ...AGGGU

miR-96-5p binding site
